# Supplementary figures and images for: [Retracted] Long Noncoding RNA LINC01503 Silencing Suppresses KLK4 Expression to Impede Pancreatic Cancer Development as miR‐1321 Sponge
Source: Hindawi journal article supplement (doi:10.1155/2023/5403344), 2023-01-01

A

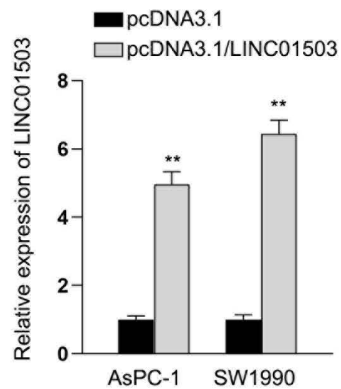

B

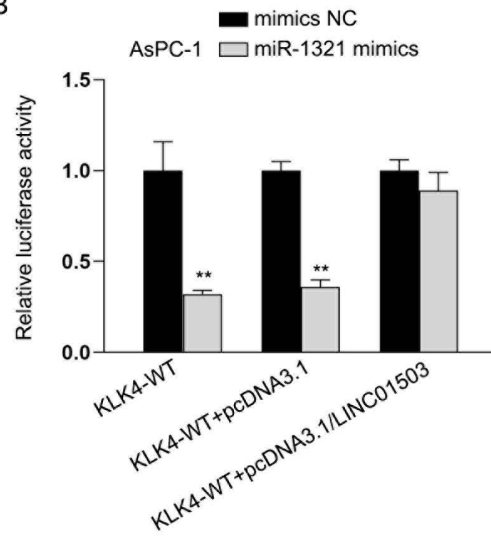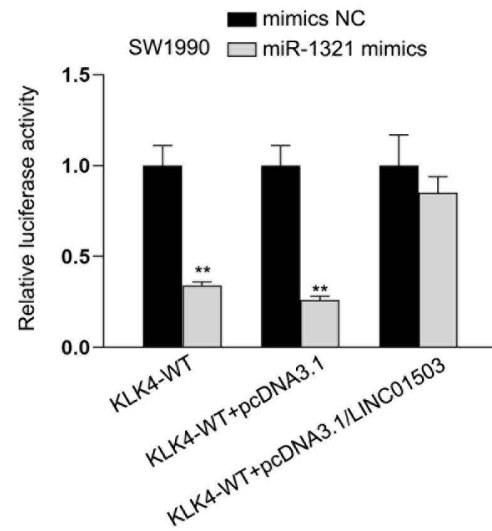

Supplement: f1 [file 5403344.f1.pdf]
